# Supplementary material for: Age-specific determinants of psychiatric outcomes after the first COVID-19 wave: baseline findings from a Canadian online cohort study
Source: Springer Nature journal article supplement (doi:10.1186/s13034-023-00560-8), 2023-02-06

**Appendix Figure 1:  
Study Recruitment Relative to COVID-19 Waves in Canada**

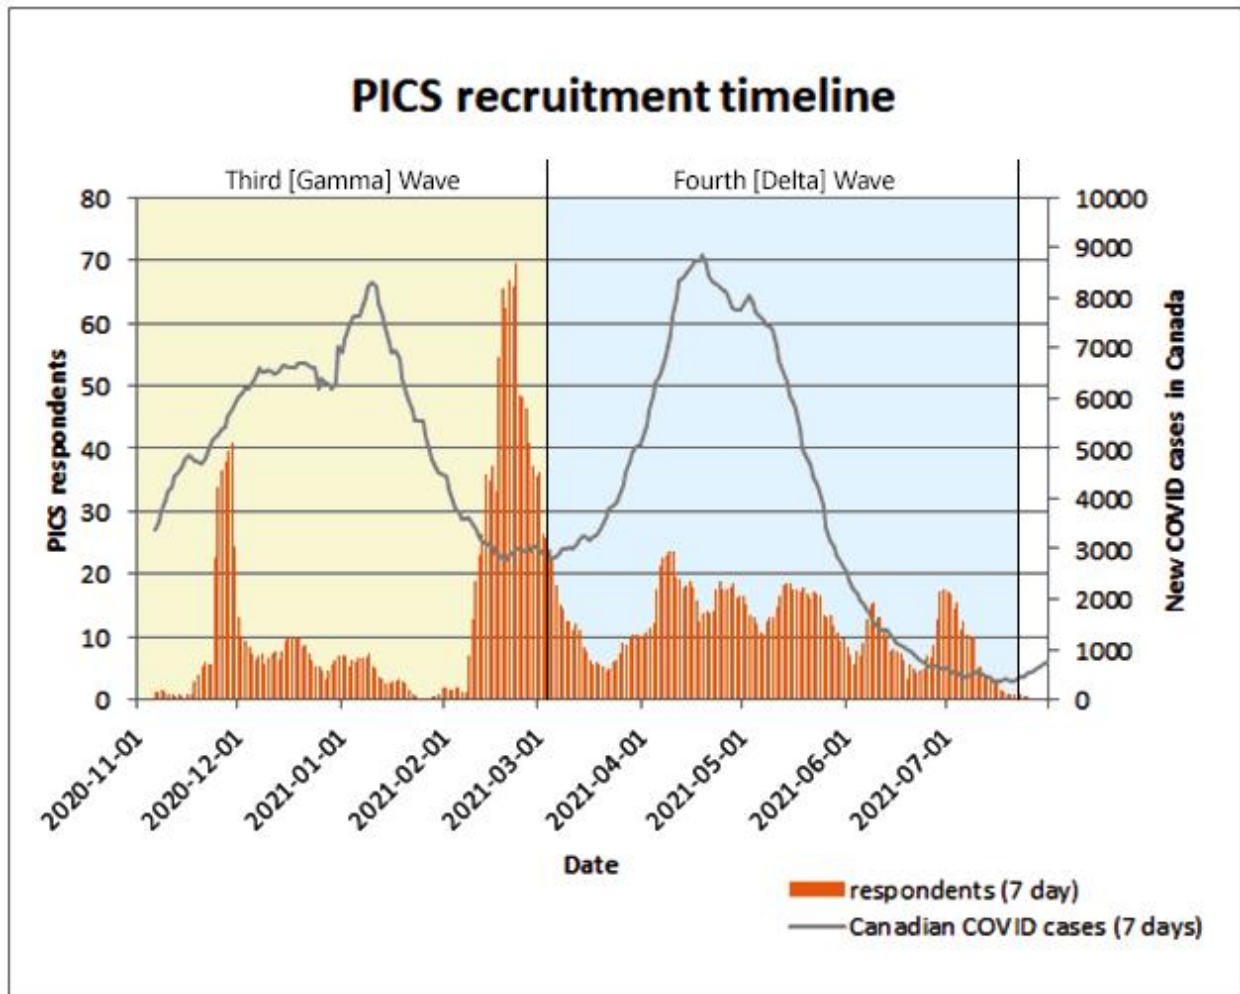

Supplement: MOESM2 [file 23997614]
