# Supplementary material for: Age-specific determinants of psychiatric outcomes after the first COVID-19 wave: baseline findings from a Canadian online cohort study
Source: Springer Nature journal article supplement (doi:10.1186/s13034-023-00560-8), 2023-02-06
Supplement: MOESM3 [file 23997614]

**Appendix Table 2:**  
**Detailed characteristics of participants and Canadian reference samples**

|                                                           | Survey detail                                                                                                                                                                                                                                                       | Canadian population reference <sup>1</sup>                                      |
|-----------------------------------------------------------|---------------------------------------------------------------------------------------------------------------------------------------------------------------------------------------------------------------------------------------------------------------------|---------------------------------------------------------------------------------|
| <b>Gender</b>                                             | female/male/non-binary                                                                                                                                                                                                                                              | female/male                                                                     |
| <b>LGBTQ2S+</b>                                           | Lesbian/ Gay/ Bisexual/<br>Transsexual/Queer/ 2 Spirit                                                                                                                                                                                                              | Lesbian/Gay/Bisexual (2015-2018) <sup>2</sup><br>15-24 y = 6.4%; 25-64 y = 3.1% |
| <b>White</b>                                              |                                                                                                                                                                                                                                                                     | indicating not being a visible minority.                                        |
| <b>Immigrant</b>                                          |                                                                                                                                                                                                                                                                     | <15 y=8.3% <sup>3</sup> ; adults=21.9% <sup>4</sup>                             |
| <b>Parent of 0-18 y</b>                                   |                                                                                                                                                                                                                                                                     | 37.5% <sup>5</sup>                                                              |
| <b>Child with special needs</b>                           |                                                                                                                                                                                                                                                                     | <15 y=10.9%; 15-19 y=4.6% <sup>6</sup>                                          |
| <b>Rural setting</b>                                      |                                                                                                                                                                                                                                                                     | 16.1% <sup>7</sup>                                                              |
| <b>Northern setting<sup>8</sup></b>                       | StatCan defined province-specific latitude cutoffs                                                                                                                                                                                                                  |                                                                                 |
| <b>Education Less than bachelor degree</b>                | Among adults                                                                                                                                                                                                                                                        | Among 25-64 y                                                                   |
| <b>Annual household income &lt; \$75 000<sup>14</sup></b> |                                                                                                                                                                                                                                                                     | Among 15+ y                                                                     |
| <b>Food Insecure</b>                                      | “Very” or “Extremely” worried about family not having enough money for food in past 2 weeks                                                                                                                                                                         | Among 15+ y <sup>9</sup>                                                        |
| <b>Number in home, mean (SD)</b>                          | 2.48 (1.47)                                                                                                                                                                                                                                                         | 2.4                                                                             |
| <b>Lifetime psychiatric diagnosis<sup>10</sup></b>        | 1064 (34%)                                                                                                                                                                                                                                                          | 33.1%                                                                           |
| <b>Alcohol/ substance use problem</b>                     |                                                                                                                                                                                                                                                                     | 15-25 y= 12%;<br>45-65 y= 2% <sup>11</sup>                                      |
| <b>Medical condition</b>                                  | 1268 (40%)<br>As confirmed by a health professional: disorder of the heart, kidneys, immune disorder, diabetes/high blood sugar, cancer, arthritis, frequent/very bad headaches, epilepsy/seizures, serious stomach/bowel problems, and serious acne/skin problems. | 0-18 y= 22% <sup>12</sup> ; >19 y=44% <sup>13</sup>                             |

Notes. Numbers (and percentages) are presented unless noted otherwise.

<sup>1</sup> Source unless otherwise noted: Statistics Canada. 2017.

<sup>2</sup> %Lesbian/Gay/Bisexual Canadians (2015-2018) 15-24 y = 6.4%; 25-64 y = 3.1%

<sup>3</sup> % immigrants <15 y <https://www12.statcan.gc.ca/census-recensement/2016/as-sa/98-200-x/2016015/98-200-x2016015-eng.cfm>

<sup>4</sup> <https://www150.statcan.gc.ca/n1/daily-quotidien/171025/dq171025b-eng.htm?indid=14428-1&indgeo=0>

<sup>5</sup> <https://www12.statcan.gc.ca/census-recensement/2016/dp-pd/dt-td/Rp-eng.cfm?TABID=2&Lang=E&APATH=3&DETAIL=0&DIM=0&FL=A&FREE=0&GC=0&GID=1235625&GK=0&GRP=1>

<sup>6</sup> <https://www12.statcan.gc.ca/census-recensement/2016/dp-pd/dt-td/Rp-eng.cfm?TABID=2&Lang=E&APATH=3&DETAIL=0&DIM=0&FL=A&FREE=0&GC=0&GID=1235625&GK=0&GRP=1&PID=109647&PRID=10&PTYPE=109445&S=0&SHOWALL=0&SUB=0&Temporal=2016&THEME=117&VID=0&VNAMEF=&D1=0&D2=0&D3=0&D4=0&D5=0&D6=0>

<sup>7</sup> Human Resources and Skills Development Canada. (2011).

<sup>8</sup> <https://www150.statcan.gc.ca/t1/tb1/en/tv.action?pid=1710013501>

<sup>9</sup> <https://www150.statcan.gc.ca/n1/pub/21-006-x/2007007/6000446-eng.htm>

<sup>9</sup> Polsky et al. 2020

<sup>10</sup> Includes psychiatric and substance disorders; Pearson, Janz and Ali. (2013)

<sup>11</sup> Pearson, Janz and Ali, 2013

<sup>12</sup> Queenan JA et al. 2021

<sup>13</sup> Public Health Agency of Canada, 2019

<sup>14</sup> Cost et al. 2022
