# Supplementary material for: Age-specific determinants of psychiatric outcomes after the first COVID-19 wave: baseline findings from a Canadian online cohort study
Source: Springer Nature journal article supplement (doi:10.1186/s13034-023-00560-8), 2023-02-06
Supplement: MOESM4 [file 23997614]

**Appendix Table 3:**

Age-group specific rates of current GAD, depression, OCD as reported at baseline in PICS Sample and in Canadian (Cdn) pre-pandemic reference samples

| <b>PICS Participants</b>                       | <b>Child<br/>&lt;8 y (parent-report)<br/>N = 192</b> | <b>Youth<br/>8-18 y (parent-report)<br/>N = 289</b> | <b>Youth<br/>8-18 y (self-report)<br/>N = 137</b> | <b>Young adult<br/>19-29 y (self-report)<br/>N = 586</b> | <b>Adult<br/>30+ y (self-report)<br/>N = 1,936</b> |
|------------------------------------------------|------------------------------------------------------|-----------------------------------------------------|---------------------------------------------------|----------------------------------------------------------|----------------------------------------------------|
| GAD                                            | 10 (5.2%)                                            | 69 (24%)                                            | 42 (31%)                                          | 319 (55%)                                                | 684 (38%)                                          |
| Depression                                     | 8 (4.2%)                                             | 76 (26%)                                            | 48 (35%)                                          | 325 (56%)                                                | 839 (46%)                                          |
| OCD                                            | 9 (4.7%)                                             | 52 (18%)                                            | 44 (33%)                                          | 136 (24%)                                                | 210 (12%)                                          |
| <b>Ontario Child Health Survey<sup>1</sup></b> | <b>Child<br/>4 to 11 y<br/>(parent-report)</b>       | <b>Youth<br/>12 to 17 y<br/>(parent-report)</b>     | <b>Youth<br/>12 to 17 y<br/>(self-report)</b>     | n/a                                                      | n/a                                                |
| GAD                                            | 3.4%                                                 | 5.5%                                                | 9.7%                                              | n/a                                                      | n/a                                                |
| Depression                                     | 1.1%                                                 | 5.2%                                                | 7.3%                                              | n/a                                                      | n/a                                                |
| <b>Statistics Canada<sup>2</sup></b>           | n/a                                                  | n/a                                                 | n/a                                               | <b>Young adult<br/>15-24 y</b>                           | <b>Adult<br/>25-64 y</b>                           |
| GAD                                            | n/a                                                  | n/a                                                 | n/a                                               | 2.4%                                                     | 3.0%                                               |
| Depression                                     | n/a                                                  | n/a                                                 | n/a                                               | 7.1%                                                     | 5.0%                                               |

<sup>1</sup> Pre-pandemic Canadian reference 6-month rates (Georgiadis et al., 2019)

<sup>2</sup> Pre-pandemic Canadian reference 12-month rates (Pearson et al. 2013).
